# Supplementary material for: Facile synthesis of porous manganese oxide/carbon composite nanowires for energy storage
Source: Royal Society of Chemistry journal article supplement (doi:10.1039/c7nj00646b), 2017-01-01
Supplement: c7nj00646b1.pdf [file c7nj00646b1.pdf]

## New Journal of Chemistry

### Supplementary Information for

### Facile synthesis of porous manganese oxide/carbon composite nanowires for energy storage

Jingjing Xu,<sup>a†</sup> Yu Peng,<sup>b†</sup> Qingbo Xia,<sup>c</sup> and Jianchen Hu<sup>b\*</sup>, Xiaodong Wu\*

<sup>a</sup> *i*-Lab, Suzhou Institute of Nano-Tech and Nano-Bionics, Chinese Academy of Sciences, No. 398 Ruoshui Road, SEID, Suzhou Industrial Park, Suzhou, Jiangsu Province, 215123, China

<sup>b</sup> National Engineering Laboratory for Modern Silk, College of Textile and Clothing Engineering, Research Center of Cooperative Innovation for Functional Organic/Polymer Material Micro/Nanofabrication, Soochow University, 199 Ren-Ai Road, Suzhou Industrial Park, Suzhou, Jiangsu, 215123, China

<sup>c</sup> School of Chemistry, The University of Sydney, Sydney, NSW2006, Australia

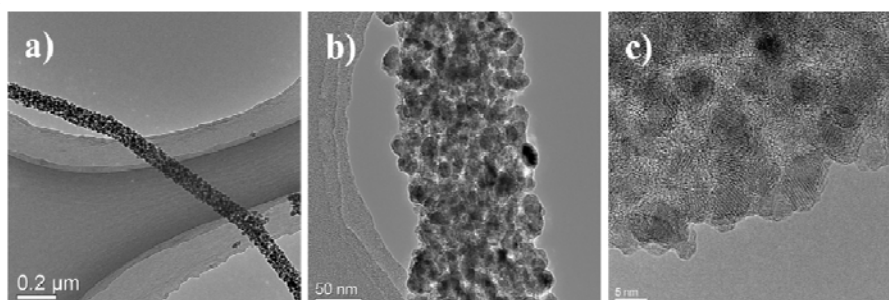

Fig. S1. TEM images of MnO/C composite nanowires with different magnification times.

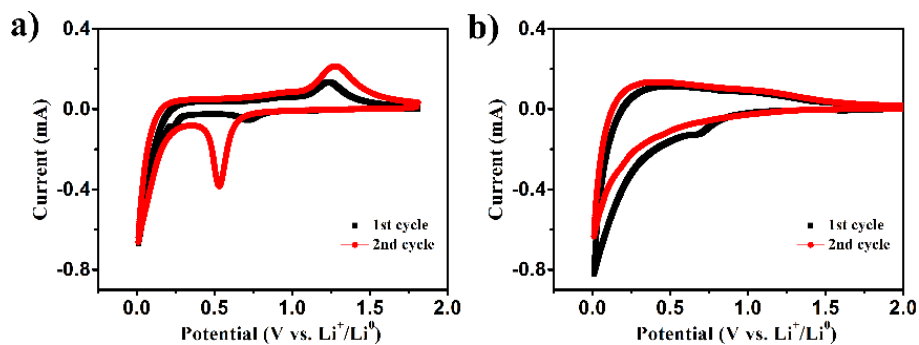

Fig. S2. CV curves of pristine MnO electrode (a) and pristine C electrode (b) at a scan rate of 0.05 mVs<sup>-1</sup>.

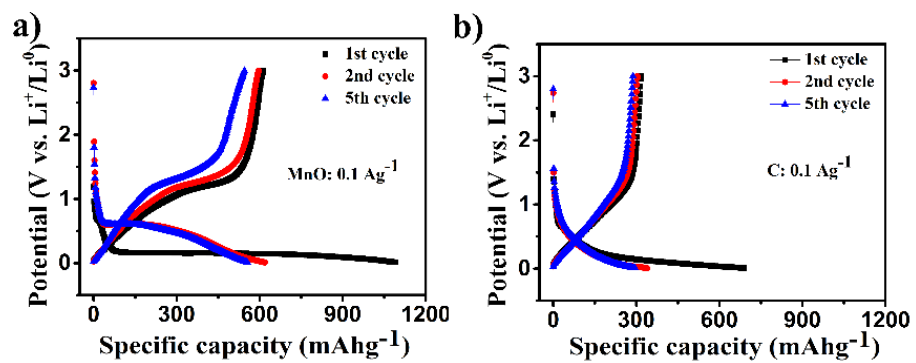

Fig. S3. Charge-discharge profiles cycles at  $0.1 \text{ Ag}^{-1}$  of pristine MnO electrode (a) and pristine C electrode (b).
